# Supplementary material
Source: PubMed Central journal article supplement (PMC4946937)
Supplement: 10.1074_M115.684241_jbc.M115.684241-1.pdf [file 10.1074_M115.684241_jbc.M115.684241-1.pdf]

**Table S1** Characterization data monovalent anti-PcrV Nanobodies

| Nanobody | P3X63 cell death assay |                           | Off-rate (s <sup>-1</sup> ) | Epitope binning      |                    |                    | Sequence                                                                                                                                |
|----------|------------------------|---------------------------|-----------------------------|----------------------|--------------------|--------------------|-----------------------------------------------------------------------------------------------------------------------------------------|
|          | pIC50 (M)              | Efficacy (%) <sup>†</sup> |                             | Nanobody bin (ELISA) | Nanobody bin (SPR) | Fab1A8 competition |                                                                                                                                         |
| 1E11     | 7.6                    | 58                        | 3.5 x 10 <sup>-04</sup>     | bin 1                | bin 1              | No                 | EVQLVESGGGLVQPGGSLRLSCAASGSTRSVNPMAWFRQAPGRQ<br>REWVATISRSGYATYADSVKGRFTISGDNAKSSVYLQMNSLKPED<br>TAVYYCVTGTGYWGQGLTVTVSS                |
| 2B02     | 5.8                    | 100                       | 3.7 x 10 <sup>-04</sup>     | bin 1                | ND                 | No                 | EVQLVESGGGLVQPGGSLRLSCAASGRILSINNVMWYRQAPGKQ<br>RELVAHITSSGSTGYADSVKGRFTISRDNKNTFYLQMTNLPED<br>TAVYYCNCWVSSDSNAPLKNYWGQGTQVTVSS         |
| 2B10     | 6.2                    | 100                       | 1.8 x 10 <sup>-04</sup>     | bin 1                | ND                 | No                 | EVQLVESGGGLVQPGGSLRLSCAASGSIFSINNMGWYRQAPGKQ<br>RELVTVVTSNLITTYADSVKGRFTISRDNKNTVYLQMNSLKPED<br>TAVYYCNAWARSVGSVPYSQFWGQGLTVTVSS        |
| 2G09     | 8.4                    | 55                        | 1.0 x 10 <sup>-03</sup>     | bin 1                | ND                 | No                 | EVQLVESGGGLVQPGGSLRLSCAASGSFGDNYELYAMTWFRQAP<br>GERRDFVASVTGDGSTSYADSVKDRFTISRDNKAKLQMYLQMN<br>SLKPEDTAVYYCRLLNWYGQGLTVTVSS             |
| 3B11     | < 6.0 <sup>†</sup>     |                           | 2.7 x 10 <sup>-03</sup>     | ND                   | bin 1 & 2          | No                 | EVQLVESGGGLVQAGGSLRLSCAASGFTFDDYVIGWFRQAPGKE<br>REGVSCISRLDGRTYTDSVKGRFTISSDNAKNTVYLQMNSLKPE<br>DTAVYYCALEPRYTGDYYPVHPELYDYWGQGTQVTVSS  |
| 3E10     | 7.3                    | 94                        | 1.5 x 10 <sup>-03</sup>     | ND                   | bin 1 & 2          | Yes                | EVQLVESGGGLVQAGGSLRLSCTASGHTFSSYTMGWFRQAPGKE<br>REFVAAMTRSGFNTHYSDSVKGRFTISRDNKNTSRDNTKITMALQ<br>MNSLKPEDTAVYYCTTGRGLTSYVANFWGQGTQVTVSS |
| 4C03     | < 5.3 <sup>†</sup>     |                           | 6.8 x 10 <sup>-03</sup>     | ND                   | bin 1              | No                 | EVQLVESGGGLVQAGGSLRLSCVISASTVRNYDMGWFRQAPGKE<br>REFVAIDWSGGSTRYADSVKGRFTVSRDNKNTVYLQMNSLKPE<br>DNTAVYYCVAAGFYNNYLRTAPNDWNYWGQGLTVTVSS   |
| 4G10     | 7.0                    | 100                       | 1.3 x 10 <sup>-04</sup>     | ND                   | bin 1              | No                 | EVQLVESGGGLVQAGGSLRLSCVISEDGVRNYDMGWFRQAPGKE<br>REFVATINWSGGSTNYADSVKGRFTVSRDNKNTMYLQMDSLKP<br>EDTAVYYCVAAGFYNNYLRTAPNDWWDWGQGTQVTVSS   |
| 5E02     | 7.4                    | 100                       | 5.7 x 10 <sup>-04</sup>     | ND                   | bin 2              | Yes                | EVQLVESGGGLVQPGGSLRLSCAASGITLDSIAICWFRQAPGKERE<br>GVSCSRGSDGSTYYADSVKGRFTISRNVNAKNTVYLQMNSLKPED<br>TAVYYCAAAPSIFYSGGYFSPGMDYWGKGTQVTVSS |
| 5H01     | 8.2                    | 100                       | 4.9 x 10 <sup>-05</sup>     | bin 2                | bin 2              | Yes                | EVQLVESGGGLVQPGGSLRLSCAASGSTLDYYAIGWFRQAPGKE<br>REGVSCSNTSGSTYYGGSVKGRFTASRDNAKNTVYLQMNSLRPE<br>DTAVYYCVATIGCATLGGTLDVQRYYYRGGGTQVTVSS  |
| 6B05     | 6.4                    | 100                       | 1.8 x 10 <sup>-04</sup>     | bin 1                | ND                 | No                 | EVQLVESGGGLVQPGGSLRLSCAASGSIFSINTMGWYRQAPGKQR                                                                                           |

|       |                 |     |                       |           |       |     |                                                                                                                                    |
|-------|-----------------|-----|-----------------------|-----------|-------|-----|------------------------------------------------------------------------------------------------------------------------------------|
|       |                 |     |                       |           |       |     | ELVSTITSNLVPHYADSVQGRFTISRDNARNTVYLQMNSLKPQDT<br>AHYYCNAWARSSGATPYTNYWGQGLTVTVSS                                                   |
| 7C10  | 7.4             | 100 | $8.2 \times 10^{-04}$ | bin 1 & 2 | ND    | Yes | EVQLVESGGGLVQAGGSLRLSCTASGRTLSSYTMGWFRQAPGTE<br>REFVAAMTRSGFNTYYADSVKGRFTISRDNSTENTMALQMSSLKPE<br>DTAVYYCTAGRGLTSYRADYWGQGLTVTVSS  |
| 7E09  | NB              |     | $4.0 \times 10^{-04}$ | bin 3     | ND    | No  | EVQLVESGGGLVQAGGSLRLSCAASGRTFSSYIMGWFRQAPGKA<br>REFVADITWGQRPYYADSVKGRFTISRDNKNTVYLEMNSLKPPE<br>DTAVYYCAADLGVVIREEHAYWGQGLTVTVSS   |
| 10C05 | $< 6.0^\dagger$ |     | $6.0 \times 10^{-04}$ | bin 1     | ND    | No  | EVQLVESGGGLVQPGGSLRLSCAASGSIFSINTMGWYRQAPGKQR<br>DLVASITMNQVPNYADSVQGRFTISRDNVRNTVHLMQNAVKPED<br>TADYFCNAWVRSSGASPYTNYWGQGTQVTVSS  |
| 11B09 | 7.0             | 100 | $4.8 \times 10^{-03}$ | bin 1     | ND    | No  | EVQLVESGGGLVQAGGSLRLSCAASRLTFNHYNMGWFRQAPGK<br>ERERVAEVTWSGDKIYYVDSVKGRFTISRDNTPNPVYLYLQMNS<br>LKPEDTAVYYCATAPRGLPYANGYWGQGTQVTVSS |
| 12B02 | NB              |     | $4.4 \times 10^{-05}$ | ND        | bin 4 | No  | EVQLVESGGGLVQPGGSLRLSCAASGFSLGVAIGWFRQAPGKER<br>EGVSCIDSSDGRTTYADSVKGRFTISRDNKNTVYLQMNSLKPED<br>TAVYYCATDIETDVCSGAGWGFWGQGTQVTVSS  |
| 13F07 | $< 5.0^\dagger$ |     | $2.0 \times 10^{-03}$ | bin 3     | bin 3 | No  | EVQLVESGGGLVQAGGSLRLSCAASGNTFSTNPMYWRQAEQK<br>QRELVASISSRGITNYADSVRGRFSISRDNKDTVYLQMNSLKPED<br>TAVYYCRLASLSSGTVYWGKGLTVTVSS        |
| 14B10 | $< 5.5^\dagger$ |     | $9.2 \times 10^{-04}$ | ND        | bin 1 | No  | EVQLVESGGGLVQPGGSLRLSCAASGRIFSINNMGWYHQAPGKQ<br>RELVATITMNGITTYADSVKGRFTISRDNKNTVYLQMNSLKPED<br>TAVYYCSCWVRSSGGDPYRDYWGQGTQVTVSS   |
| 14E10 | $< 5.5^\dagger$ |     | $6.0 \times 10^{-04}$ | bin 1     | ND    | No  | EVQLVESGGGLVQPGGSLRLSCAASGRIFSINTMGWYRQAPGKQ<br>RELVAGVTINAITNYADSVKGRFTISRDNKNTVWLQMNSLKPPE<br>DTAVYYCHAWARSSGSAPYSQNWGQGTQVTVSS  |

<sup>‡</sup>: Efficacy (% inhibition of *Pa*-mediated cell death) is expressed relative to the assay window spanned by the condition in absence of *Pa* (no *Pa*-mediated cell death) and the condition in the presence of *Pa* without blocking Nanobody (no inhibition of *Pa*-mediated cell death) (see also Table 1 and Fig. 6A).

ND: not-determined

NB: No blocking observed in tested concentration range

<sup>†</sup>: No complete dose response curve obtained in tested concentration range
