# Supplementary material
Source: PubMed Central journal article supplement (PMC4946937)
Supplement: 10.1074_M115.684241_jbc.M115.684241-2.pdf [file 10.1074_M115.684241_jbc.M115.684241-2.pdf]

**Table S2** Statistical analysis of hits derived from screening the bivalent/biparatomic Nanobody library (Fig. 4) and of the library quality control sample.

|                                                               | Library design †                       | Screening hits §                      |                                           |                    | Library QC sample ‡                   |                                         |                    |
|---------------------------------------------------------------|----------------------------------------|---------------------------------------|-------------------------------------------|--------------------|---------------------------------------|-----------------------------------------|--------------------|
| Criterion                                                     | Matching criterion (counts out of 361) | Matching criterion (counts out of 65) | Fraction matching criterion (hits/design) | Chi Square P-value | Matching criterion (counts out of 65) | Fraction matching criterion (QC/design) | Chi Square P-value |
| <b>Combinations of different epitope bin representatives</b>  |                                        |                                       |                                           |                    |                                       |                                         |                    |
| all                                                           | 258                                    | 59                                    | higher                                    | 0.001              | 46                                    | lower                                   | 0.9086             |
| 1 x 1part                                                     | 36                                     | 9                                     | higher                                    | 0.3496             | 5                                     | lower                                   | 0.5661             |
| 1 x 1&2                                                       | 54                                     | 7                                     | lower                                     | 0.3747             | 11                                    | higher                                  | 0.6851             |
| 1 x 2                                                         | 36                                     | 5                                     | lower                                     | 0.5661             | 6                                     | lower                                   | 0.8535             |
| 1 x 3                                                         | 36                                     | 10                                    | higher                                    | 0.1956             | 8                                     | higher                                  | 0.569              |
| 1 x 4                                                         | 18                                     | 0                                     | lower                                     | 0.0658             | 2                                     | lower                                   | 0.5029             |
| 2 x 1&2                                                       | 12                                     | 10                                    | higher                                    | <0.0001            | 2                                     | lower                                   | 0.918              |
| 2 x 1part                                                     | 8                                      | 7                                     | higher                                    | 0.0006             | 0                                     | lower                                   | 0.2257             |
| 2 x 3                                                         | 8                                      | 7                                     | higher                                    | 0.0006             | 1                                     | lower                                   | 0.7266             |
| 2 x 4                                                         | 4                                      | 0                                     | lower                                     | 0.3938             | 2                                     | higher                                  | 0.215              |
| 3 x 1part                                                     | 8                                      | 0                                     | lower                                     | 0.2257             | 0                                     | lower                                   | 0.2257             |
| 3 x 1&2                                                       | 12                                     | 2                                     | lower                                     | 0.918              | 2                                     | lower                                   | 0.918              |
| 3 x 4                                                         | 4                                      | 0                                     | lower                                     | 0.3938             | 1                                     | higher                                  | 0.7668             |
| 4 x 1part                                                     | 4                                      | 0                                     | lower                                     | 0.3938             | 1                                     | higher                                  | 0.7668             |
| 4 x 1&2                                                       | 6                                      | 0                                     | lower                                     | 0.2952             | 0                                     | lower                                   | 0.2952             |
| 1part x 1&2                                                   | 12                                     | 2                                     | lower                                     | 0.918              | 5                                     | higher                                  | 0.0977             |
| <b>Combinations of same epitope bin representatives</b>       |                                        |                                       |                                           |                    |                                       |                                         |                    |
| all                                                           | 103                                    | 6                                     | lower                                     | 0.001              | 19                                    | higher                                  | 0.9086             |
| 1 x 1                                                         | 81                                     | 5                                     | lower                                     | 0.0064             | 13                                    | lower                                   | 0.6626             |
| 1part x 1part                                                 | 4                                      | 1                                     | higher                                    | 0.7668             | 0                                     | lower                                   | 0.3938             |
| 1&2 x 1&2                                                     | 9                                      | 0                                     | lower                                     | 0.1982             | 2                                     | higher                                  | 0.7847             |
| 2 x 2                                                         | 4                                      | 0                                     | lower                                     | 0.3938             | 2                                     | higher                                  | 0.215              |
| 3 x 3                                                         | 4                                      | 0                                     | lower                                     | 0.3938             | 1                                     | higher                                  | 0.7668             |
| 4 x 4                                                         | 1                                      | 0                                     | lower                                     | 0.671              | 1                                     | higher                                  | 0.1708             |
| <b>Combinations with epitope bin in Nter or Cter position</b> |                                        |                                       |                                           |                    |                                       |                                         |                    |
| 1                                                             | 261                                    | 36                                    | lower                                     | 0.0063             | 45                                    | lower                                   | 0.313              |
| 1part                                                         | 72                                     | 19                                    | higher                                    | 0.0927             | 11                                    | lower                                   | 0.6127             |
| 1&2                                                           | 105                                    | 21                                    | higher                                    | 0.6003             | 22                                    | higher                                  | 0.4399             |
| 2                                                             | 72                                     | 29                                    | higher                                    | <0.0001            | 13                                    | higher                                  | 0.9918             |
| 3                                                             | 72                                     | 19                                    | higher                                    | 0.0927             | 13                                    | higher                                  | 0.9918             |
| 4                                                             | 37                                     | 0                                     | lower                                     | 0.0069             | 7                                     | higher                                  | 0.8991             |
| <b>Combinations with epitope bin in Nter position</b>         |                                        |                                       |                                           |                    |                                       |                                         |                    |
| 1                                                             | 171                                    | 14                                    | lower                                     | 0.0001             | 30                                    | lower                                   | 0.8567             |
| 1part                                                         | 38                                     | 10                                    | higher                                    | 0.2541             | 4                                     | lower                                   | 0.2763             |
| 1&2                                                           | 57                                     | 13                                    | higher                                    | 0.3991             | 11                                    | higher                                  | 0.8183             |
| 2                                                             | 38                                     | 14                                    | higher                                    | 0.0125             | 8                                     | higher                                  | 0.6701             |
| 3                                                             | 38                                     | 14                                    | higher                                    | 0.0125             | 7                                     | higher                                  | 0.9532             |

|                                                                  |     |    |        |        |    |        |        |
|------------------------------------------------------------------|-----|----|--------|--------|----|--------|--------|
| 4                                                                | 19  | 0  | lower  | 0.0585 | 5  | higher | 0.4343 |
| <b>Combinations with epitope bin in Cter position</b>            |     |    |        |        |    |        |        |
| 1                                                                | 171 | 29 | lower  | 0.6822 | 28 | lower  | 0.5232 |
| 1part                                                            | 38  | 10 | higher | 0.2541 | 7  | higher | 0.9532 |
| 1&2                                                              | 57  | 8  | lower  | 0.4724 | 13 | higher | 0.3991 |
| 2                                                                | 38  | 15 | higher | 0.0048 | 7  | higher | 0.9532 |
| 3                                                                | 38  | 5  | lower  | 0.485  | 7  | higher | 0.9532 |
| 4                                                                | 19  | 0  | lower  | 0.0585 | 3  | lower  | 0.828  |
| <b>Combinations with building block in Nter or Cter position</b> |     |    |        |        |    |        |        |
| 002B02                                                           | 37  | 2  | lower  | 0.0649 | 5  | lower  | 0.5244 |
| 002B10                                                           | 37  | 6  | lower  | 0.8019 | 8  | higher | 0.6192 |
| 004C03                                                           | 37  | 0  | lower  | 0.0069 | 8  | higher | 0.6192 |
| 004G10                                                           | 37  | 8  | higher | 0.6192 | 5  | lower  | 0.5244 |
| 006B05                                                           | 37  | 4  | lower  | 0.3027 | 11 | higher | 0.1172 |
| 010C05                                                           | 37  | 1  | lower  | 0.0233 | 5  | lower  | 0.5244 |
| 011B09                                                           | 37  | 10 | higher | 0.2238 | 3  | lower  | 0.1517 |
| 014E10                                                           | 37  | 7  | higher | 0.8991 | 6  | lower  | 0.8019 |
| 014B10                                                           | 37  | 2  | lower  | 0.0649 | 7  | higher | 0.8991 |
| 001E11                                                           | 37  | 16 | higher | 0.0012 | 5  | lower  | 0.5244 |
| 002G09                                                           | 37  | 4  | lower  | 0.3027 | 6  | lower  | 0.8019 |
| 003B11                                                           | 37  | 0  | lower  | 0.0069 | 10 | higher | 0.2238 |
| 003E10                                                           | 37  | 6  | lower  | 0.8019 | 11 | higher | 0.1172 |
| 007C10                                                           | 37  | 15 | higher | 0.0036 | 3  | lower  | 0.1517 |
| 005E02                                                           | 37  | 14 | higher | 0.0099 | 9  | higher | 0.3897 |
| 005H01                                                           | 37  | 15 | higher | 0.0036 | 5  | lower  | 0.5244 |
| 007E09                                                           | 37  | 1  | lower  | 0.0233 | 6  | lower  | 0.8019 |
| 013F07                                                           | 37  | 18 | higher | 0.0001 | 8  | higher | 0.6192 |
| 012B02                                                           | 37  | 0  | lower  | 0.0069 | 7  | higher | 0.8991 |

Shown are the numbers of bivalent/biparatopic Nanobodies that match different criteria. For instance, the criterion “Combinations of different epitope bin representatives | 2 x 4” refers to bivalent/biparatopic Nanobodies containing a monovalent building block belonging to bin 2 and a monovalent building block belonging to bin 4; the criterion “Combinations with epitope bin representatives in Nter or Cter position | 1part” refers to bivalent/biparatopic Nanobodies that contain a partially blocking bin 1 monovalent building block in either the N-terminal or C-terminal position; the criterion “Combinations with a given building block in Nter or Cter position | 002B02” refers to bivalent/biparatopic Nanobodies that contain building block 2B02 in the N-terminal or C-terminal position.

65 screening hits (<sup>§</sup>, see also Fig. 4) or 65 randomly picked quality control samples (<sup>‡</sup>) were compared to the 361 possible combinations of the library design (<sup>†</sup>) by means of chi square analysis. In case the fraction of screening hits or quality control samples matching a certain criterion differed significantly ( $P < 0.05$ ) from the library design, the  $P$ -values are shown in blue; if not, the  $P$ -values are shown in red. The absence of significant differences between the randomly picked quality control sample and the library design, for any of the specified criteria, highlights the quality of the library as it was generated, matching the library design specifications. Consequently, significant differences between the screening hits and the library design suggest that these criteria (enriched or decreased) contribute to the improved inhibition of *Pseudomonas aeruginosa*-mediated cell death by the 65 hits compared to the remainder of the 960 clones screened. For a more detailed discussion of the significant changes, see Results section.
